# Supplementary material for: An extended interaction site determines binding between AP180 and AP2 in clathrin mediated endocytosis
Source: Springer Nature journal article supplement (doi:10.1038/s41467-024-50212-4), 2024-07-13
Supplement: MOESM1 [file 41467_2024_50212_MOESM1_ESM.pdf]

Supplementary Information

**An extended interaction site in the neuronal AP180 is responsible for recruitment of AP2 in clathrin mediated endocytosis**

Samuel Naudi-Fabra *et al.*

\*Corresponding author. Email: milles@fmp-berlin.de

**Supplementary Figures:**

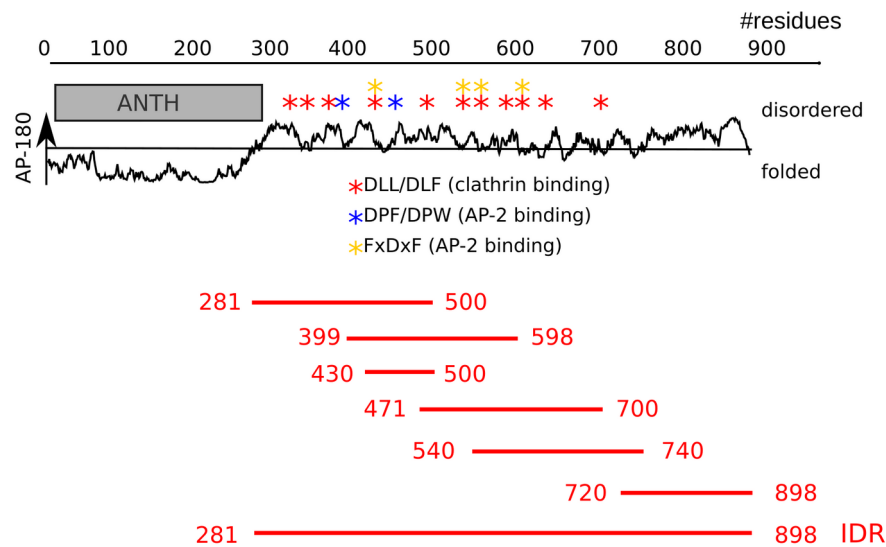

**Supplementary Figure 1: Disorder analysis of AP180 and divide and conquer approach.** Top: Disorder prediction (IUPred<sup>1</sup>) of AP180 along its sequence. The gray box represents the folded ANTH (AP180 N-terminal homology) domain. Stars above the disorder prediction represent putative interaction sites with the clathrin heavy chain terminal domain and with the AP2 appendage domains as indicated in the figure. Illustrated below are the constructs used in this study. The numbers on the left and on the right represent the N-terminal and C-terminal limits of the different constructs (called 'segments'), respectively.

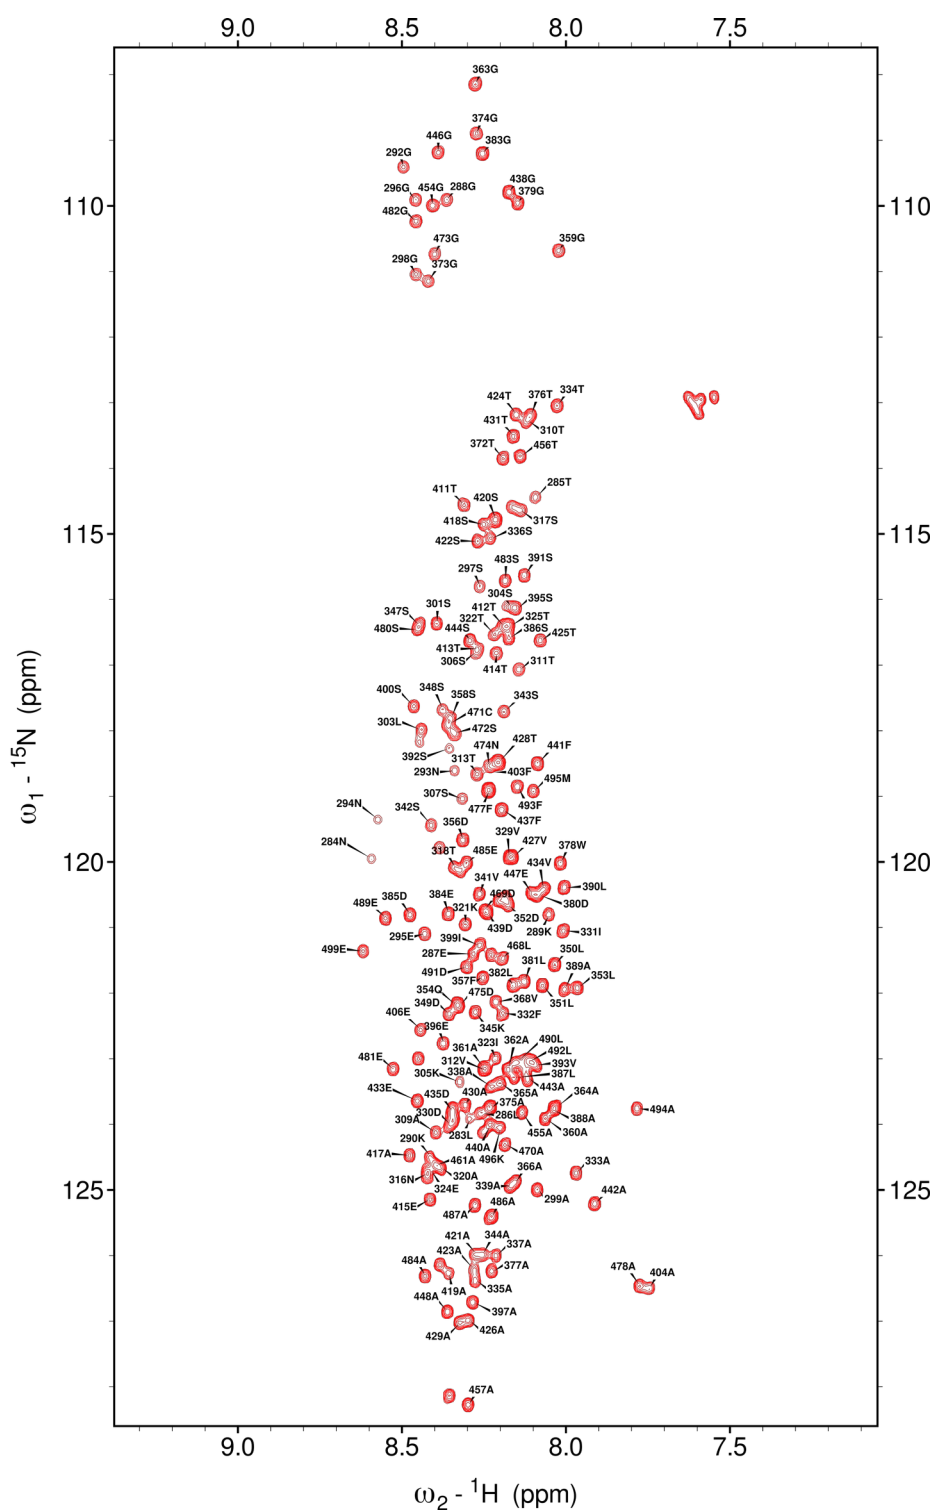

**Supplementary Figure 2: Assignment of AP180<sub>281-500</sub>.** The  $^1\text{H}$ - $^{15}\text{N}$  HSQC of AP180<sub>281-500</sub> showing the peak assignment. Note that all numbers are shifted by +1 with respect to the protein sequence for cloning reasons. 83% of the non-proline residues have been assigned.

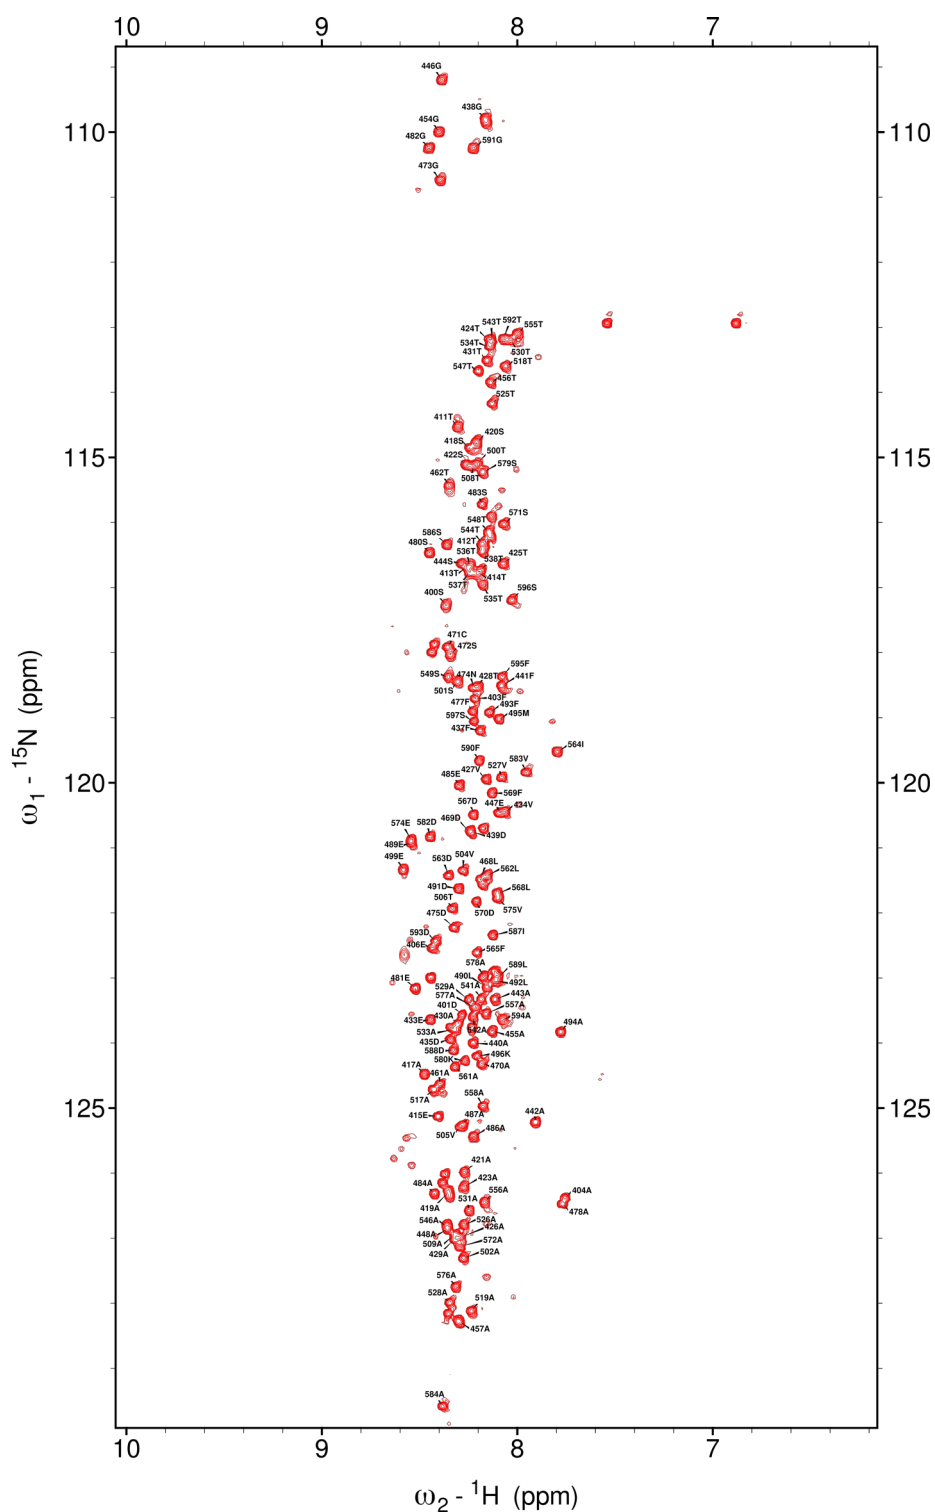

**Supplementary Figure 3: Assignment of AP180<sub>399-598</sub>.** The  $^1\text{H}$ - $^{15}\text{N}$  HSQC of AP180<sub>399-598</sub> showing the peak assignment. Note that all numbers are shifted by +1 with respect to the protein sequence for cloning reasons. 81% of the non-proline residues have been assigned.

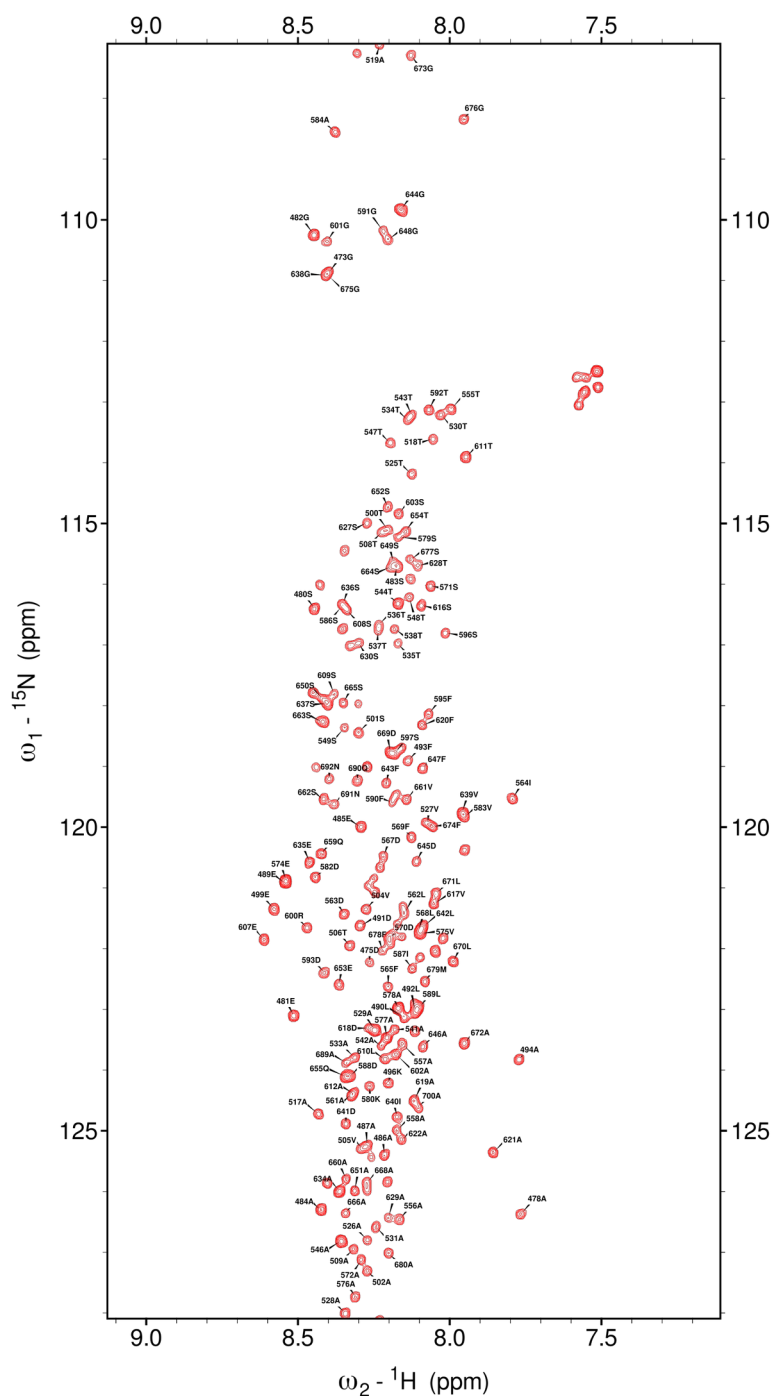

**Supplementary Figure 4: Assignment of AP180<sub>471-700</sub>.** The  $^1\text{H}$ - $^{15}\text{N}$  HSQC of AP180<sub>471-700</sub> showing the peak assignment. Note that all numbers are shifted by +1 with respect to the protein sequence for cloning reasons. 75% of the non-proline residues have been assigned.

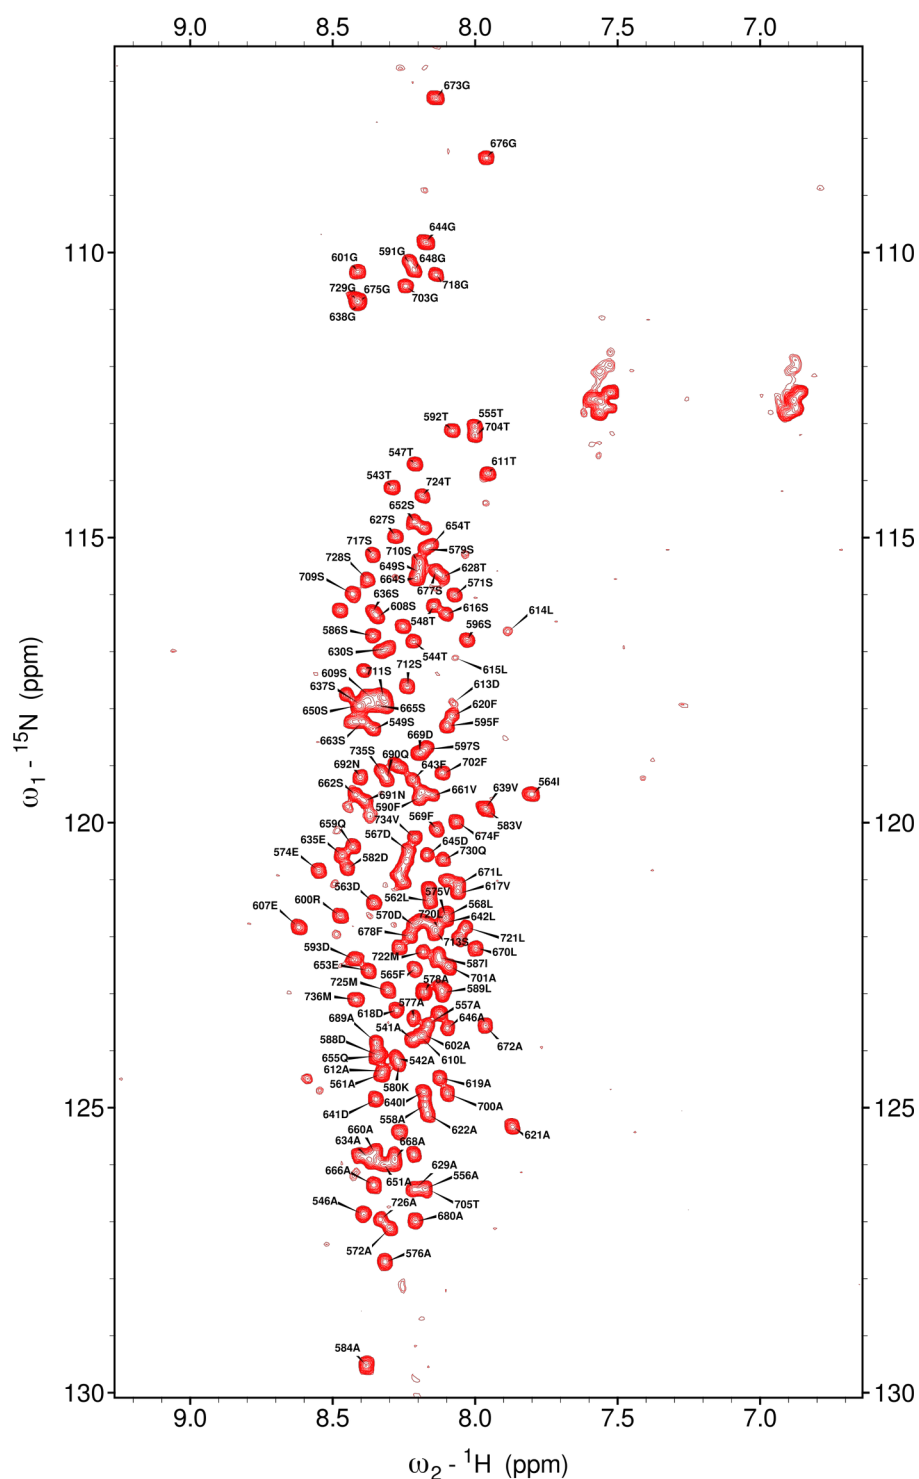

**Supplementary Figure 5: Assignment of AP180<sub>540-740</sub>.** The  $^1\text{H}$ - $^{15}\text{N}$  HSQC of AP180<sub>540-740</sub> showing the peak assignment. Note that all numbers are shifted by +1 with respect to the protein sequence for cloning reasons. 70% of the non-proline residues have been assigned.

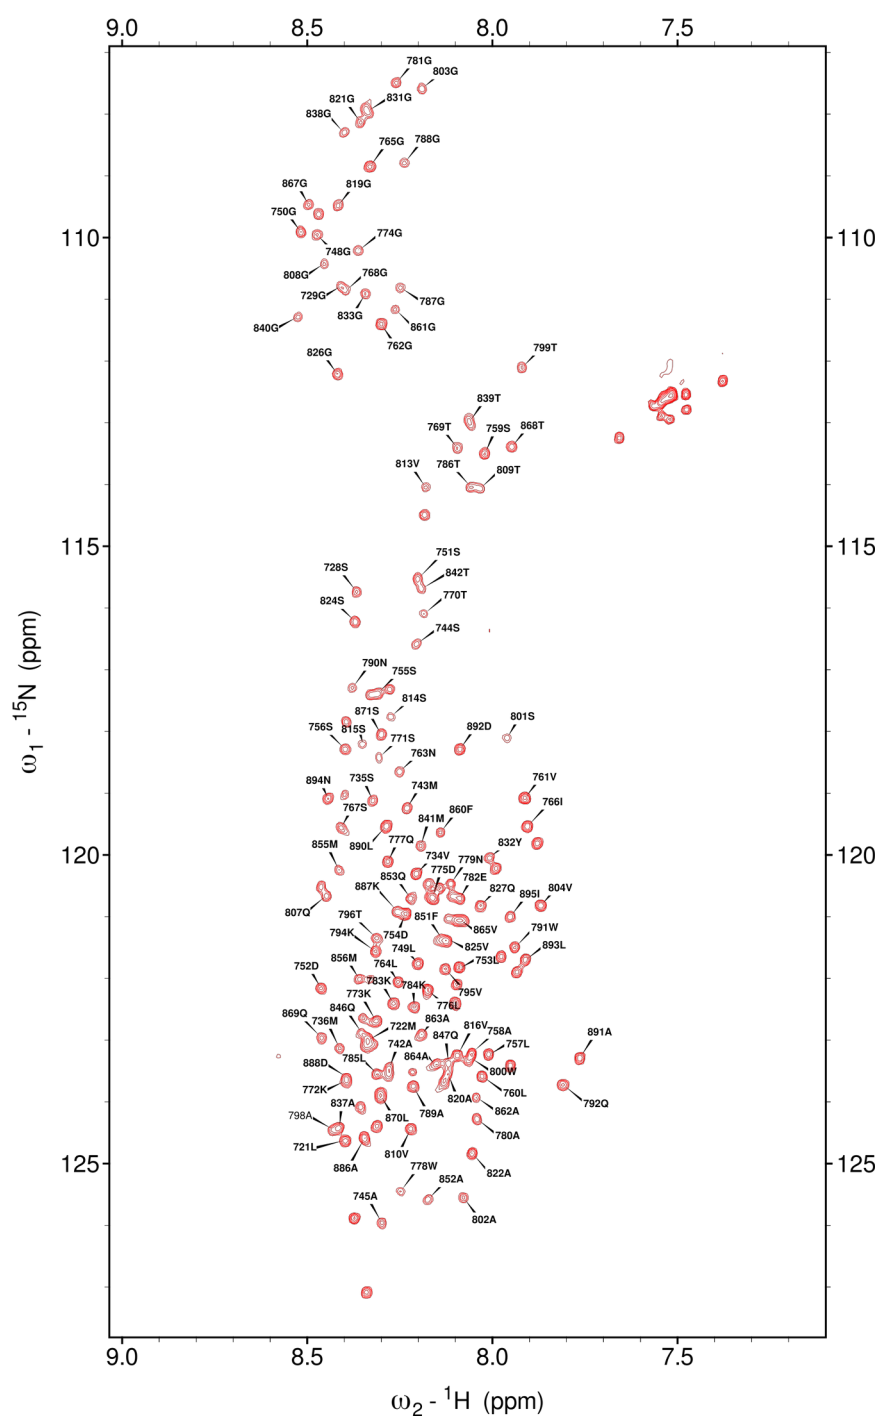

**Supplementary Figure 6: Assignment of AP180<sub>720-898</sub>.** The  $^1\text{H}$ - $^{15}\text{N}$  HSQC of AP180<sub>720-898</sub> showing the peak assignment. Note that all numbers are shifted by +1 with respect to the protein sequence for cloning reasons. 71% of the non-proline residues have been assigned.

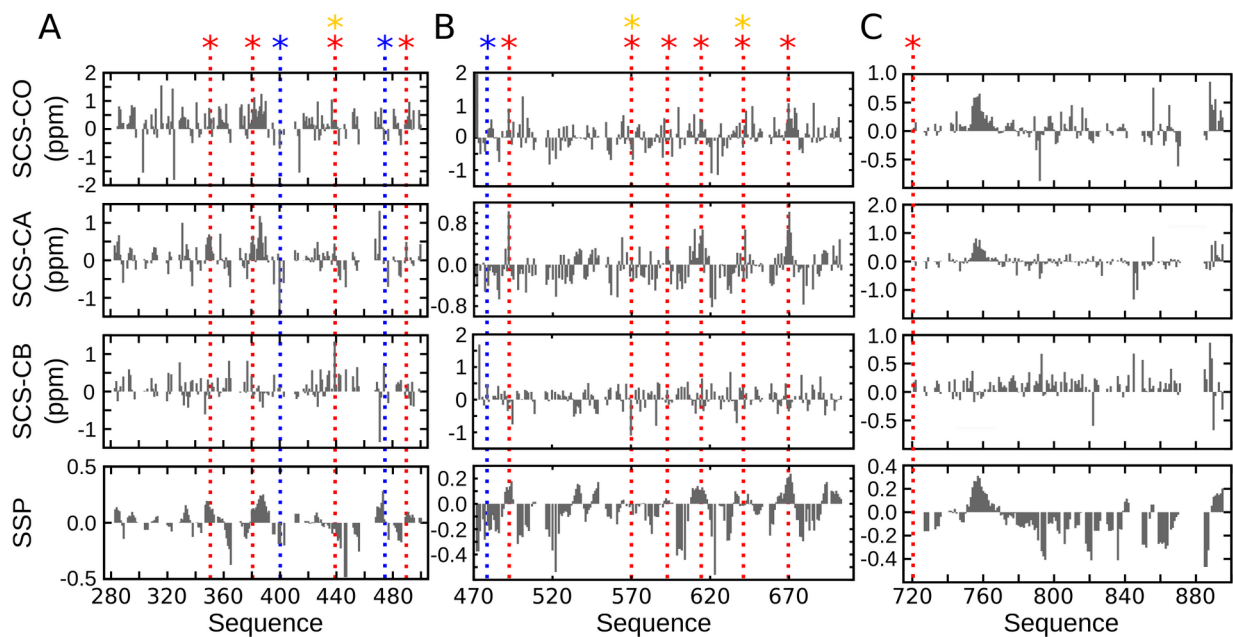

**Supplementary Figure 7: Secondary structure analysis of AP180.** Shown are carbon secondary chemical shifts and secondary structure propensities (SSP) calculated from C $\alpha$  and C $\beta$  chemical shifts<sup>2</sup>. 1: helical conformation, -1: extended conformation, values in between represent intermediate states. Shown are the data of constructs **(A)** AP180<sub>281-500</sub> **(B)** AP180<sub>471-700</sub> **(C)** AP180<sub>720-898</sub>. Colored stars indicate putative interaction sites for clathrin (DLL/DLF) and AP2  $\alpha$ - and  $\beta$ 2-appendage domains, respectively (DPF, FxDxF) (legend as in Fig. 1 and Supplementary Fig. 1).



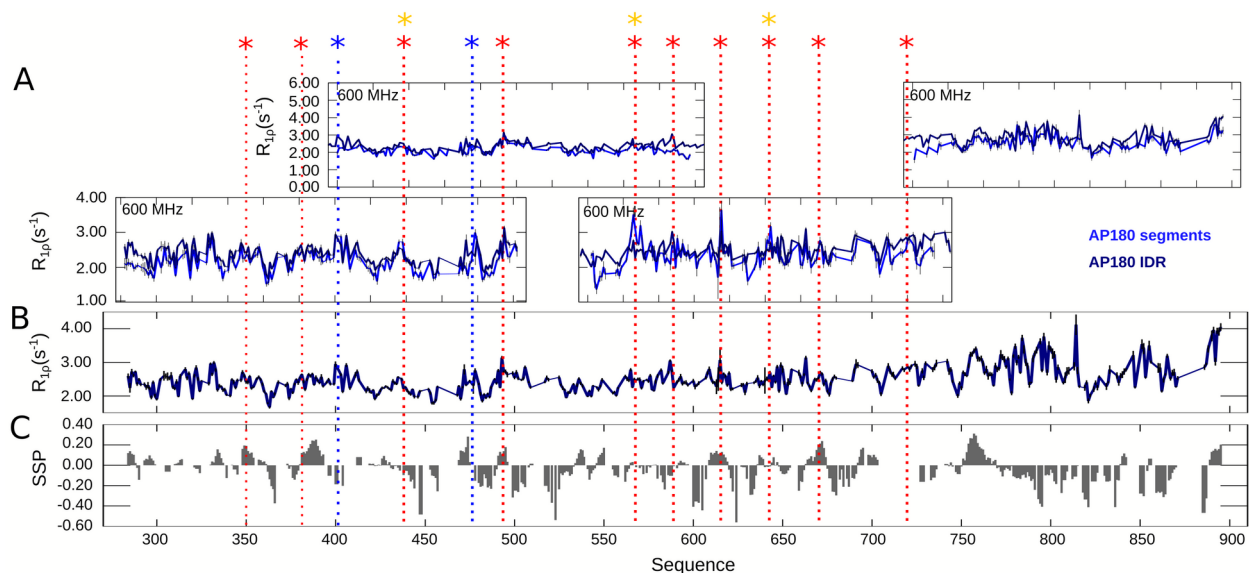

**Supplementary Figure 8: Conformational dynamics of AP180 IDR.** (A)  $^{15}\text{N}$   $R_{1\rho}$  relaxation of different AP180 segments (blue) compared to the full length IDR (dark blue). Error bars are shown as black lines. (B) Full display of AP180<sub>IDR</sub>  $R_{1\rho}$  (dark blue, error bars in black). (C) Secondary structure propensities (SSP)<sup>2</sup> calculated and merged from  $C_{\alpha}$  and  $C_{\beta}$  chemical shifts of the different AP180 segments. Colored stars indicate putative interaction sites for clathrin (DLL/DLF) and AP2  $\alpha$ - and  $\beta$ 2-appendage domains, respectively (DPF, FxDxF) (legend as in Fig. 1 and Supplementary Fig. 1).

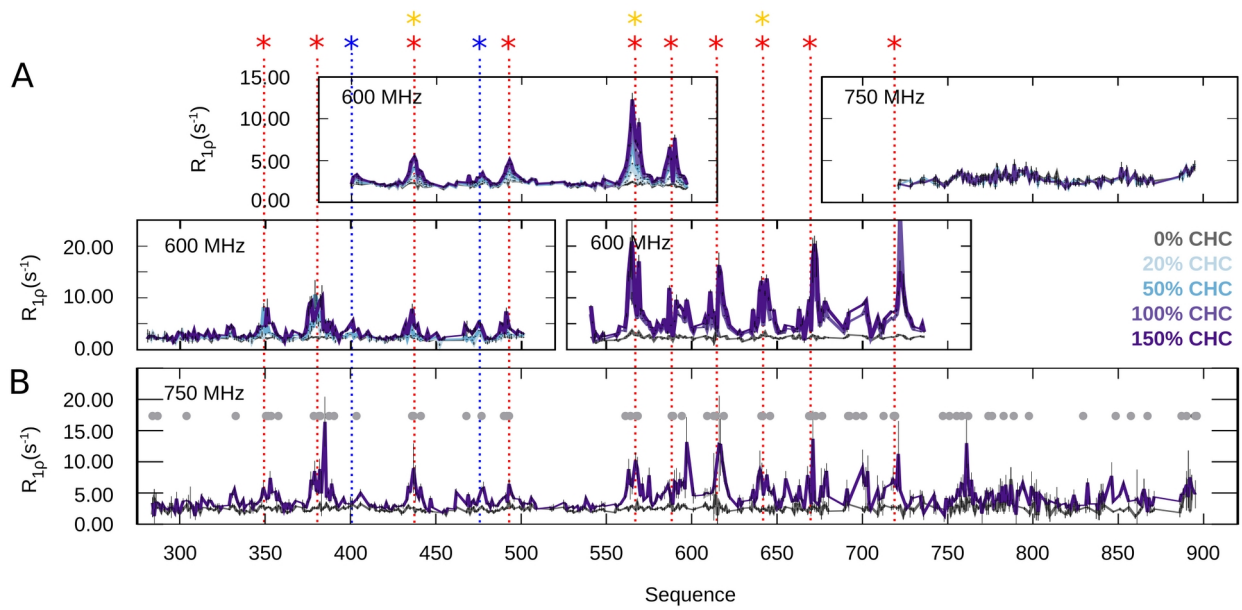

**Supplementary Figure 9: Relaxation of AP180 in the absence and presence of CHC<sub>TD</sub>.**  $R_{1\rho}$  relaxation rates are shown at an AP180 concentration of 100  $\mu$ M and at increasing concentrations of CHC<sub>TD</sub> (color legend shown in (A)). **(A)** Interaction of different AP180 segments with CHC<sub>TD</sub>. **(B)** Interaction of AP180<sub>IDR</sub> with CHC<sub>TD</sub>. Hydrophobic residues LFWY are shown as gray points along the sequence in (B). Field strengths ( $^1$ H Larmor frequencies) at which the relaxation rates were recorded are shown in the respective plots. Colored stars indicate putative interaction sites for clathrin (DLL/DLF) and AP2  $\alpha$ - and  $\beta$ 2-appendage domains, respectively (DPF, FxDxF) (legend as in Fig. 1 and Supplementary Fig. 1).

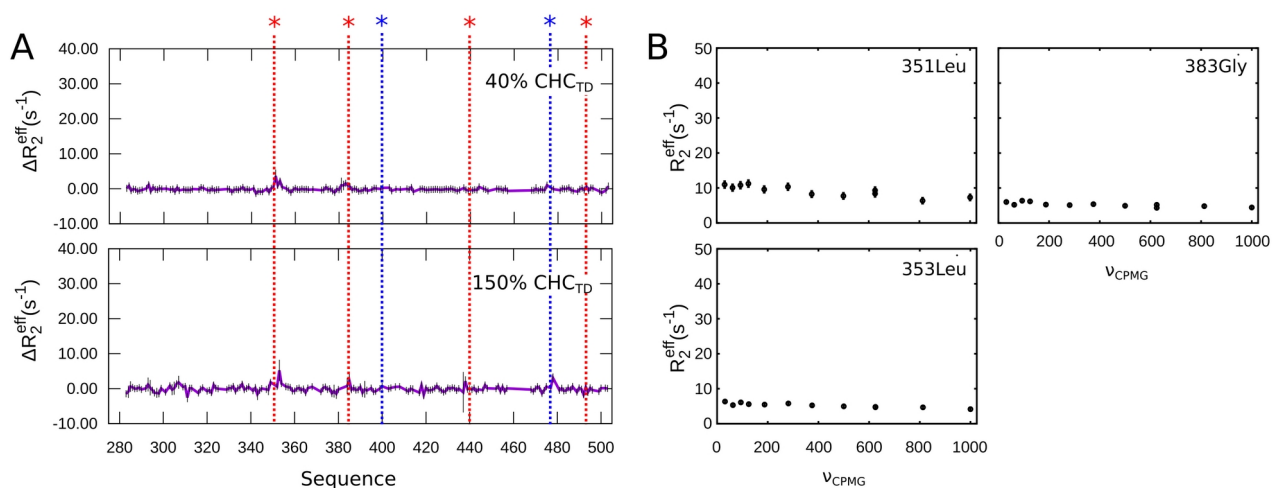

**Supplementary Figure 10: CPMG relaxation dispersion of AP180<sub>281-500</sub> with different concentrations of CHC<sub>TD</sub>.** (A)  $\Delta R_2^{\text{eff}}$  as derived from CPMG relaxation dispersion experiments of 100  $\mu\text{M}$   $^{15}\text{N}$  AP180<sub>281-500</sub> with 40% and 150% CHC<sub>TD</sub> compared to the concentration of AP180<sub>281-500</sub>. Plotted is the difference between  $R_2^{\text{eff}}$  at CPMG frequencies of 31.35 Hz and 1000 Hz. (B) CPMG curves of AP180<sub>281-500</sub> with 40% CHC<sub>TD</sub> for residues 351Leu, 353Leu and 383Gly, the residues showing the highest  $\Delta R_2^{\text{eff}}$  in this experiment. Data were recorded at a  $^1\text{H}$  Larmor frequency of 600 MHz. Errors were propagated from the errors of the CPMG experiment.

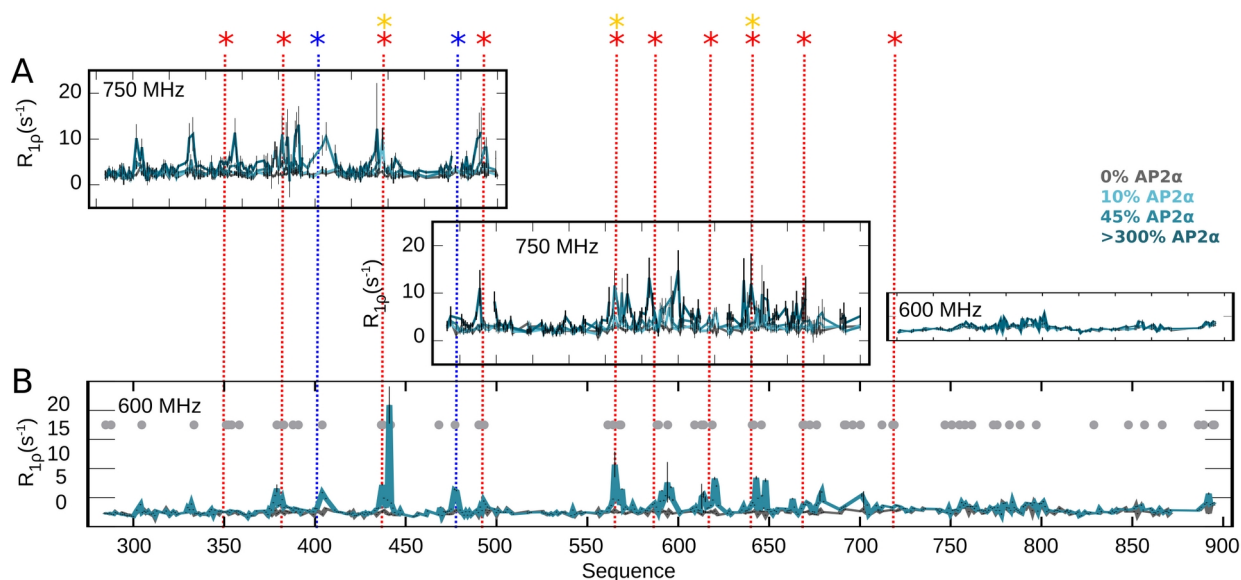

**Supplementary Figure 11: Relaxation of AP180 in the absence and presence of AP2 $\alpha$ .** (A)  $R_{1\rho}$  relaxation rates of AP180 segments are shown at an AP180 concentration of 50  $\mu$ M and at increasing concentrations of AP2 $\alpha$  (color legend shown in (A)). (B) Interaction of the full AP180<sub>IDR</sub> with AP2 $\alpha$ . The concentration of AP180<sub>IDR</sub> in the absence and presence of 45% AP2 $\alpha$  was 100  $\mu$ M and 91  $\mu$ M, respectively. Hydrophobic residues LFWY are shown as gray points along the sequence in (B). Field strengths ( $^1$ H Larmor frequencies) at which the relaxation rates were recorded are shown in the respective plots. Colored stars indicate putative interaction sites for clathrin (DLL/DLF) and AP2  $\alpha$ - and  $\beta$ 2-appendage domains, respectively (DPF, FxDxF) (legend as in Fig. 1 and Supplementary Fig. 1).

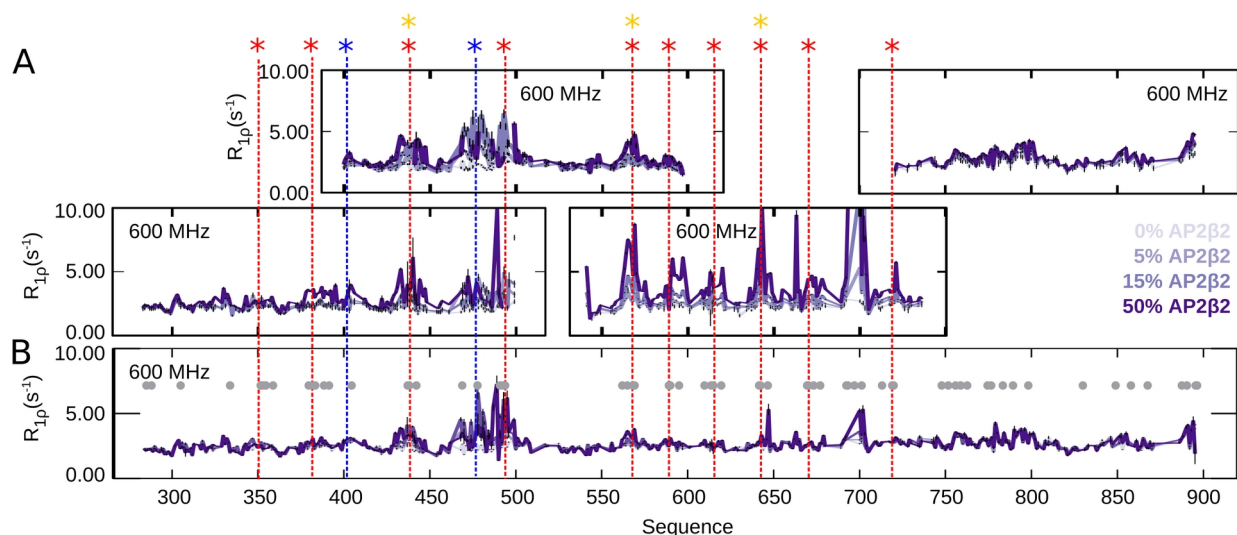

**Supplementary Figure 12: Relaxation of AP180 in the absence and presence of AP2 $\beta$ 2.** (A)  $^{15}\text{N}$   $R_{1\rho}$  relaxation rates are shown at an AP180 concentration of 100  $\mu\text{M}$  and at increasing concentrations of AP2 $\beta$ 2 (color legend shown in (A)). (B) Interaction of the full AP180 $_{\text{IDR}}$  with AP2 $\beta$ 2. Hydrophobic residues LFWY are shown as gray points along the sequence in (B). Field strengths ( $^1\text{H}$  Larmor frequencies) at which the relaxation rates were recorded are shown in the respective plots. Colored stars indicate putative interaction sites for clathrin (DLL/DLF) and AP2  $\alpha$ - and  $\beta$ 2-appendage domains, respectively (DPF, FxDxF) (legend as in Fig. 1 and Supplementary Fig. 1). Note that NMR resonances around the EIM disappear already at very low concentrations of AP2 $\beta$ 2. At high admixtures (> 15%) it was thus not possible to determine  $R_{1\rho}$  rates throughout the whole interaction site, leading to apparently comparable rates around the EIM in construct AP180 $_{281-500}$  or AP180 $_{399-598}$  and the SLiMs in construct AP180 $_{541-740}$ . Domination of the EIM over SLiMs is obvious in the rates of the full AP180 $_{\text{IDR}}$  (B).

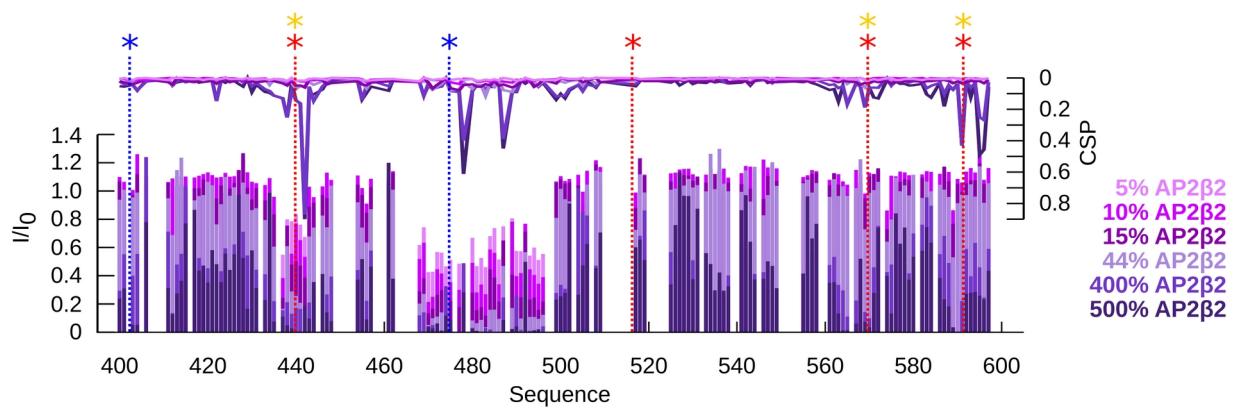

**Supplementary Figure 13: Interaction of AP180<sub>399-598</sub> with higher concentrations of AP2β2.**

Top: Chemical shift perturbations of AP180<sub>399-598</sub> at increasing concentrations of AP2β2. Bottom: Intensity ratios ( $I/I_0$ ) extracted from  $^1\text{H}$ - $^{15}\text{N}$  HSQC spectra on AP180<sub>399-598</sub> alone and in the presence of increasing concentrations of AP2β2. AP180<sub>399-598</sub> has been concentrated to 100μM in all samples. Color legend for the different AP2β2 concentrations are on the right. Colored stars indicate putative interaction sites for clathrin (DLL/DLF) and AP2 α- and β2-appendage domains, respectively (DPF, FxDxF) (legend as in Fig. 1 and Supplementary Fig. 1).

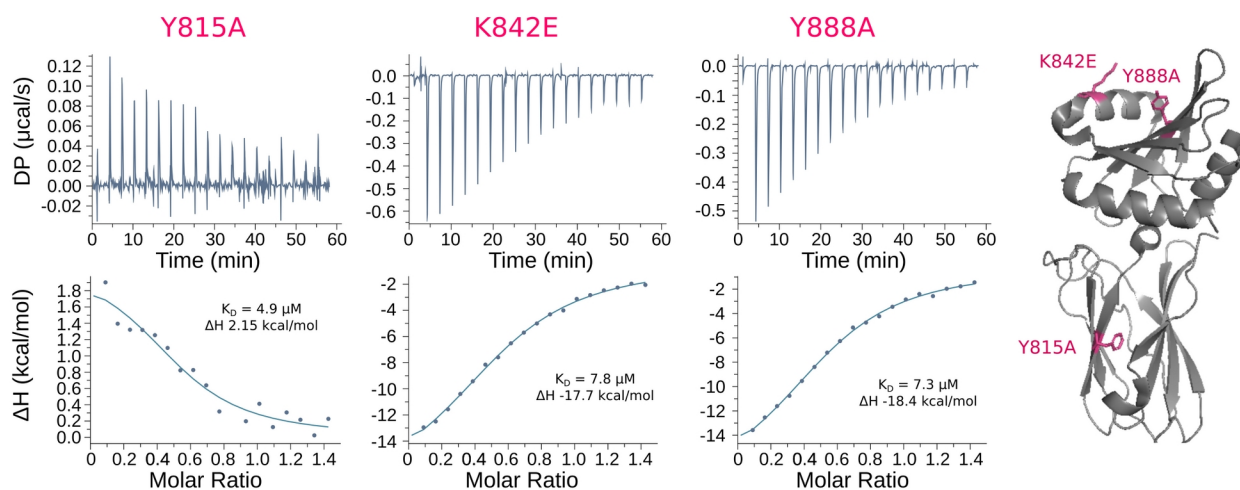

**Supplementary Figure 14: ITC of AP180<sub>399-598</sub> with AP2 $\beta$ 2 mutants.** Differential heating powers (DP) per injection are shown on top, enthalpy versus molar ratio of the interaction partners are shown in the bottom row. The data are fitted with a 1:1 binding model resulting in the affinities indicated in the respective graphs ( $K_D$  values and binding enthalpies  $\Delta H$  are shown in the respective graphs). The structure of AP2 $\beta$ 2 with the different mutations indicated in pink is shown on the right.

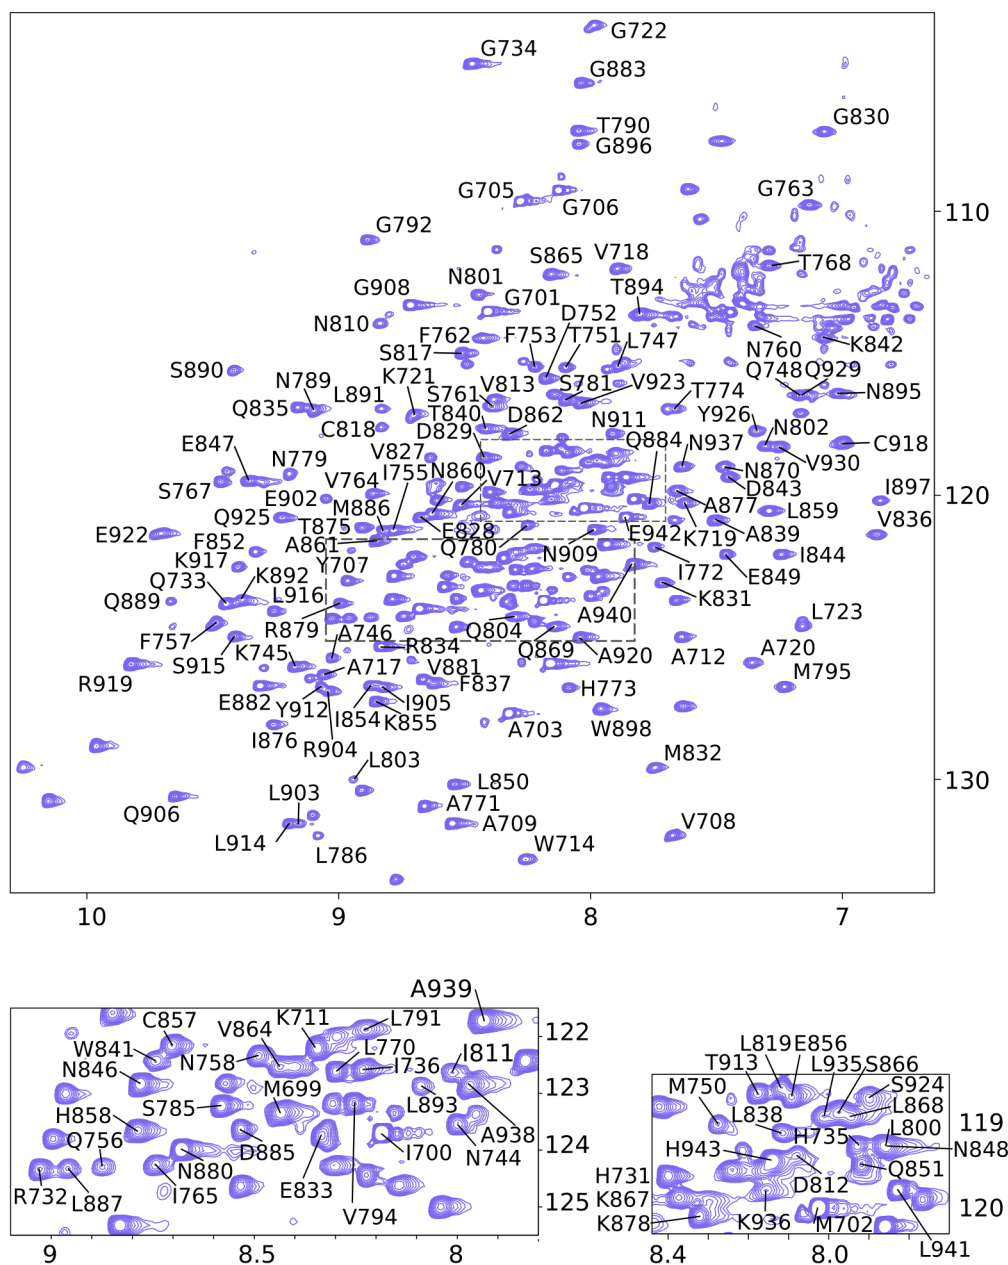

**Supplementary Figure 15: Assignment of AP2 $\beta$ <sub>2714-950</sub>.** The  $^1\text{H}$ - $^{15}\text{N}$  TROSY of deuterated AP2 $\beta$ <sub>2714-950</sub> showing the peak assignment. Overlapped regions are shown as a zoom below the spectrum and correspond to the boxed regions within the full spectrum of AP2 $\beta$ <sub>2714-950</sub>. 62% of the non-proline residues have been assigned.



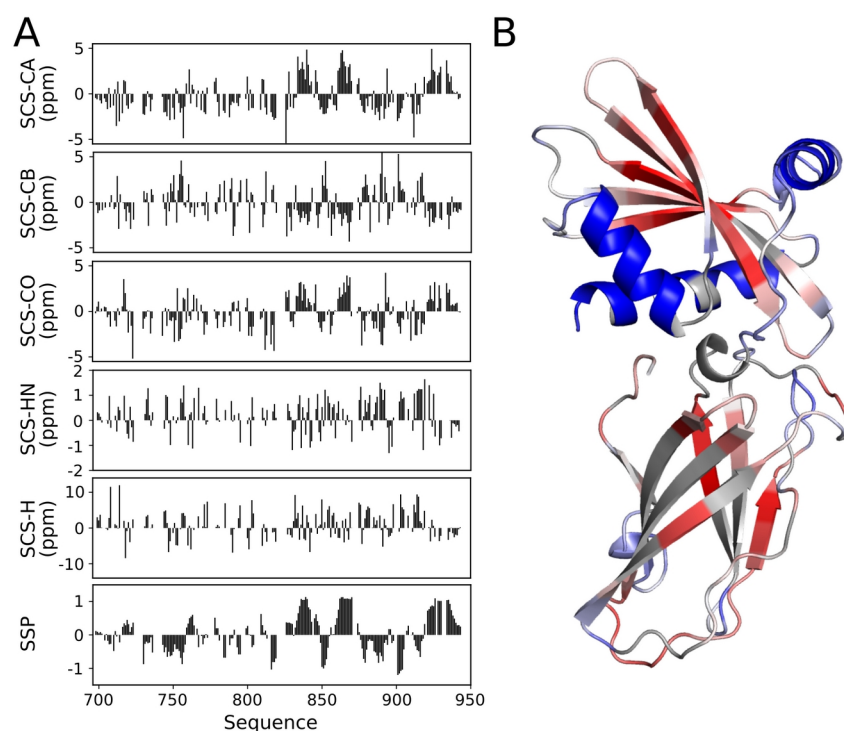

**Supplementary Figure 16: Secondary structure analysis of AP2β<sub>2714-950</sub>.** **(A)** Secondary chemical shifts of AP2β<sub>2714-950</sub> and secondary structure propensities (SSP) calculated from Cα and Cβ chemical shifts<sup>2</sup>. 1: helical conformation, -1: extended conformation, values in between represent intermediate states. **(B)** SSPs plotted into the structure of APβ2 (PDB 1E42) with a gradient from -1 (red) to +1 (blue). Gray residues are unassigned or prolines.

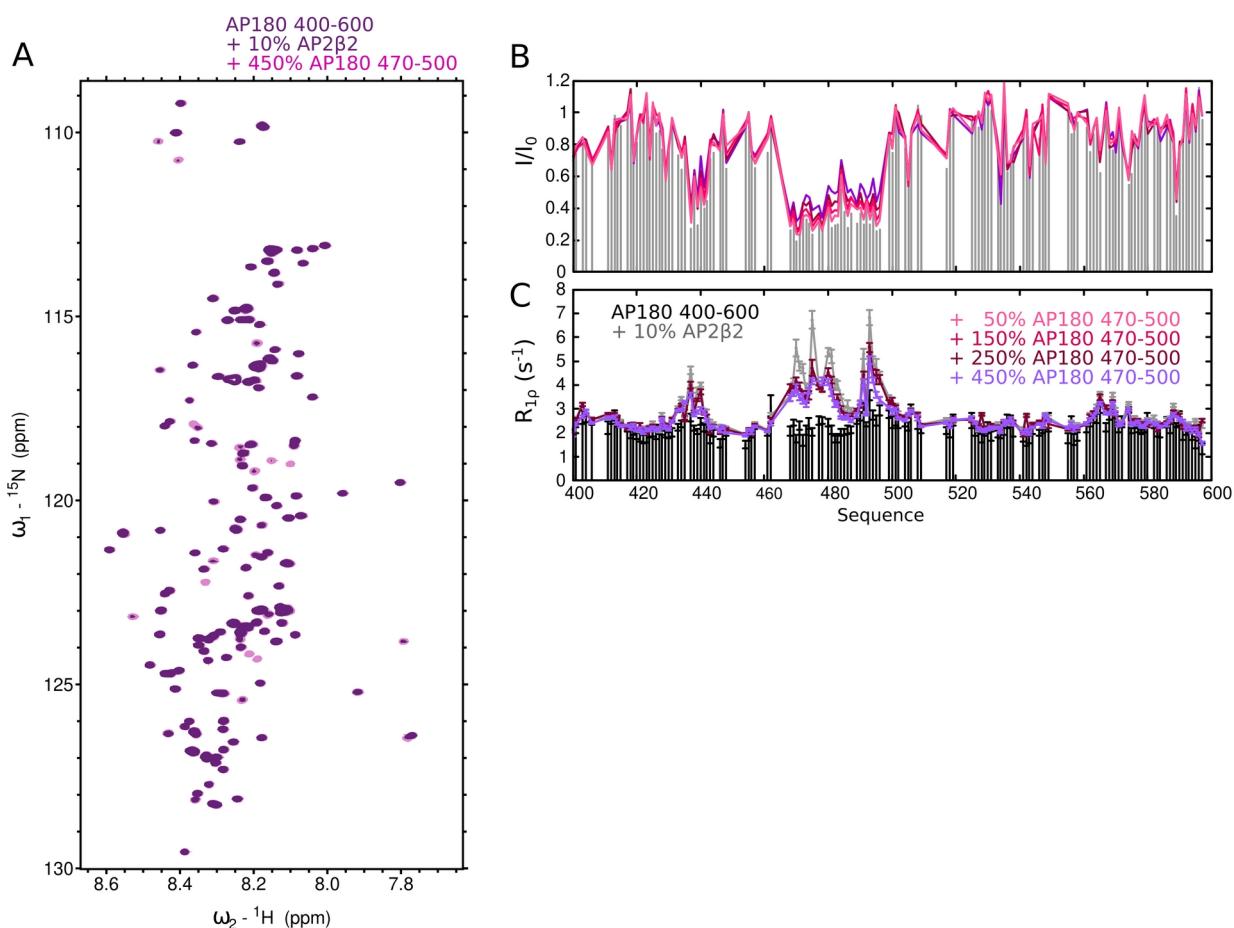

**Supplementary Figure 17: Competition of AP180<sub>399-598</sub> from AP2β2 binding by AP180<sub>470-500</sub>.** **(A)**  $^1\text{H}$ - $^{15}\text{N}$  HSQC spectrum of  $^{15}\text{N}$  AP180<sub>399-598</sub> at 100  $\mu\text{M}$  with 10% AP2β2 and additionally AP180<sub>470-500</sub> (color legend is indicated in the figure). **(B)** Intensity ratio ( $I/I_0$ ) of AP180<sub>399-598</sub> peaks in the presence versus the absence of 10% AP2β2 + increasing amounts of AP180<sub>470-500</sub> (color legend in (C)). **(C)**  $^{15}\text{N}$   $R_{1\rho}$  relaxation rates of AP180<sub>399-598</sub> in the presence of 10% AP2β2 with increasing amounts of AP180<sub>470-500</sub> and AP180<sub>399-598</sub> alone (color legend is displayed in the figure), measured at a  $^1\text{H}$  Larmor frequency of 900 MHz

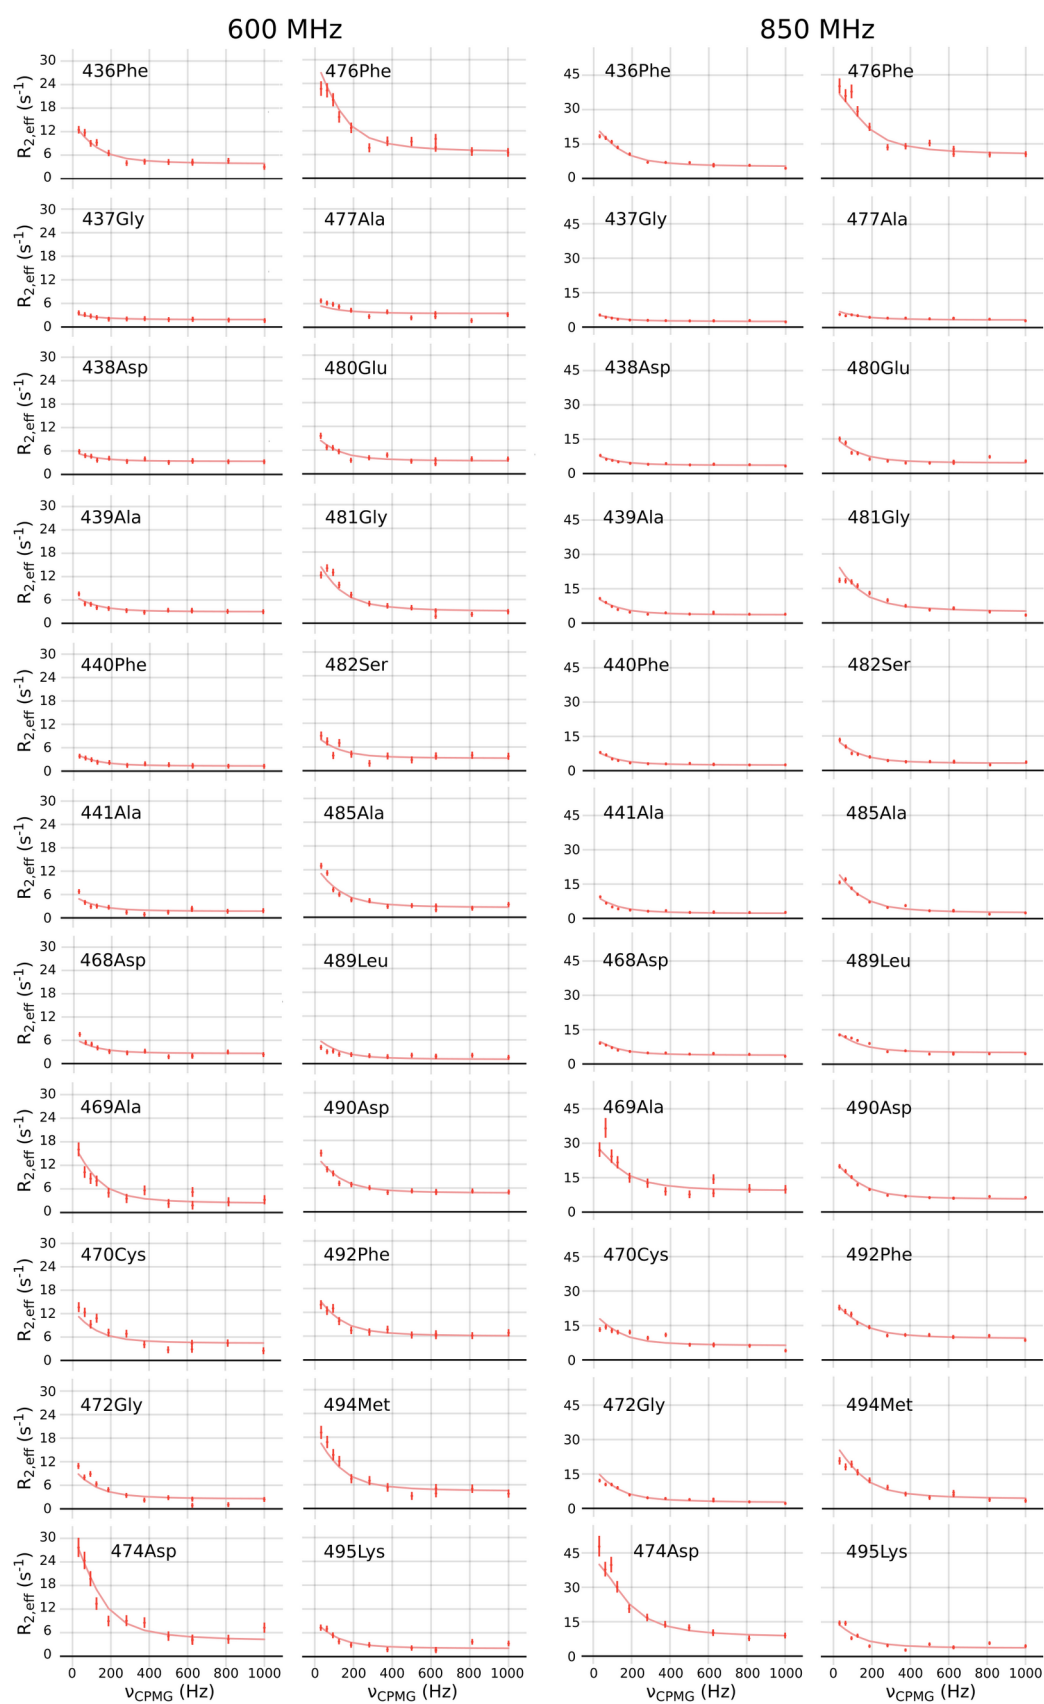

**Supplementary Figure 18: CPMG relaxation dispersion of AP180<sub>399-598</sub> (100  $\mu$ M) with 10% AP2 $\beta$ 2. Data from all 22 sites showing relaxation dispersion at a  $^1H$  frequency of 600 MHz and 850 MHz were fit using the program Chemex in a global fit, assuming a two-site exchange process**

(unbound – bound). The data fitted to  $k_{\text{ex}} = 662 \pm 35 \text{ s}^{-1}$  and a population of the bound state  $p_{\text{B}} = 8.9 \pm 0.97 \%$ . Chemical shift difference obtained from the fit were in the range of 0.3 and 1 ppm.

## Supplementary Tables:

**Supplementary Table 1: List of clathrin binding regions.** The regions are centered around the hydrophobic residue within the cluster of increased  $R_{1p}$  rates. 10 residues left and right of that central residues were selected. The sequences were then sorted according to apparent affinities; sequences with the highest  $R_{1p}$  rates in AP180<sub>IDR</sub> upon interaction with CHC<sub>TD</sub> appear first.

```
371TGGATAWGDLLGEDSLAALSS391
660VSSSSASADLLAGFGGSFMAP680
584PSIDLFGTDAFSSPPRGASPV604
604VPESLTADLLSVDAFAAPSP624
749GSDLDSLASLVGNLGISGTT769
710SSSFDP SGDLLMPTMAPSGQP730
687PAQNNLLQPNFEAAF GTTPST707
554TAAAPPALDIFGDLFDSAPEV574
632KAESSGVIDLFGDAFGSSASE652
425VTAATTEVDLFGDAFAASPGE445
345SSDLLDLQPDFSGAAAGAAAP365
465ALDACSGNDPFAPSEGSAEAA485
481SAEAAPELDL FAMKPPETSAP501
```

**Supplementary Table 2: Residue wise affinities in AP180<sub>IDR</sub> with CHC<sub>TD</sub>.** <sup>15</sup>N R<sub>1ρ</sub> relaxation rates of AP180<sub>IDR</sub> in the presence of various concentrations of CHC<sub>TD</sub> (0%, 20%, 60%, 150%) at an AP180 concentration of 100 μM were plotted against the respective CHC concentration and fitted with a 1:1 binding model (see materials and methods for details, errors represent fitting errors). The highest R<sub>1ρ</sub> rates per cluster were used for this analysis, respectively. Note that this apparently highest R<sub>1ρ</sub> rate does not necessarily occur at a hydrophobic residue, depending on the exact binding mode of the residue and potentially influenced by spectral overlap within the large AP180<sub>IDR</sub>. Nonetheless, the determined affinities should represent binding affinities towards individual linear motifs.

| Residue number | Residue type | Surrounding amino acids | Affinity ± error (μM) |
|----------------|--------------|-------------------------|-----------------------|
| 384            | D            | GEDSL                   | 177 ± 8               |
| 670            | L            | DLLAG                   | 294 ± 67              |
| 596            | S            | FSSPP                   | 1507 ± 1165           |
| 615            | S            | LLSVD                   | 719 ± 335             |
| 720            | L            | DLLMP                   | 732 ± 320             |
| 566            | D            | FGDLF                   | 549 ± 131             |
| 436            | F            | DLFGD                   | 700 ± 58              |
| 699            | A            | FEAAF                   | 1166 ± 957            |
| 639            | I            | GVIDL                   | 846 ± 307             |
| 678            | M            | SFMAP                   | 576 ± 10±7            |
| 378            | G            | AWGDL                   | 650 ± 83              |
| 574            | V            | PEVAA                   | 817 ± 133             |
| 891            | D            | LADLN                   | 1248 ± 864            |
| 352            | L            | LDLQP                   | 1011 ± 214            |
| 492            | F            | DLFAM                   | 1170 ± 215            |
| 477            | A            | PFAPS                   | 1374 ± 308            |

**Supplementary Table 3: Residue wise affinities in AP180 with AP2 $\alpha$ .**  $^{15}\text{N}$   $R_{1\rho}$  relaxation rates from AP180<sub>471-700</sub> in the presence of various concentrations of AP2 $\alpha$  (0%, 10%, 45%, 320%) at an AP180 concentration of 50  $\mu\text{M}$  were plotted against the respective CHC concentration and fitted with a 1:1 binding model (see materials and methods for details, errors represent fitting errors). The highest  $R_{1\rho}$  rates per cluster were used for this analysis, respectively. Note that this apparently highest  $R_{1\rho}$  rate does not necessarily occur at a hydrophobic residue, depending on the exact binding mode of the residue and potentially influenced by spectral overlap. Nonetheless, the determined affinities should represent binding affinities towards individual linear motifs.

| Residue number | Residue type | Surrounding amino acids | Affinity $\pm$ error ( $\mu\text{M}$ ) |
|----------------|--------------|-------------------------|----------------------------------------|
| 490            | D            | ELDLF                   | 278 $\pm$ 83                           |
| 498            | E            | PPETS                   | 463 $\pm$ 154                          |
| 561            | L            | PALDI                   | 380 $\pm$ 47                           |
| 571            | A            | DSAPE                   | 320 $\pm$ 60                           |
| 582            | V            | PDVAP                   | 414 $\pm$ 27                           |
| 585            | S            | APSID                   | 459 $\pm$ 253                          |
| 596            | S            | FSSPP                   | 391 $\pm$ 79                           |
| 599            | R            | PPRGA                   | 234 $\pm$ 132                          |
| 602            | S            | GASPV                   | 441 $\pm$ 156                          |
| 615            | S            | LLSVD                   | 144 $\pm$ 28                           |
| 635            | S            | AESSG                   | 196 $\pm$ 61                           |
| 639            | I            | GVIDL                   | 257 $\pm$ 125                          |
| 648            | S            | TTSA                    | 316 $\pm$ 58                           |
| 664            | S            | SSSAS                   | 416 $\pm$ 198                          |
| 668            | D            | SADLL                   | 288 $\pm$ 110                          |
| 669            | L            | ADLLA                   | 273 $\pm$ 74                           |

**Supplementary Table 4: Peptides detected by mass spectrometry from AP180<sub>430-500</sub> cross-linking experiment.** The peptides are sorted with respect to type (crosslink, monolink, looplink or regular peptide). The detected peptides are indicated; numbers in brackets denote the position of the cross-linked lysine within the detected peptide. Their molecular mass is given in daltons (Da) and peptide modifications are indicated. The number in brackets refers to the residue number within the peptide that is modified; counts start from the first peptide and go on to the second; three residues are added in addition if the modification occurs in the second peptide. The detected peptides are then associated to the protein they originate from; in brackets is the position of the cross-linked lysine with respect to the full protein sequence used in the cross-linking experiment. The amino acid sequences of both AP180<sub>430-500</sub>, as well as AP $\beta$ <sub>2714-951</sub> are indicated below the table.

| Crosslink       | Peptide                                                  | Peptide_Mass | Modifications                     | Proteins                            |
|-----------------|----------------------------------------------------------|--------------|-----------------------------------|-------------------------------------|
|                 | 1 AAPELDLFAMKPPE(11)-AAPELDLFAMKPPE(11)                  | 3210.598759  | Oxidation[M](10)                  | AP180_430-500(69)-AP180_430-500(69) |
|                 | 2 AAPELDLFAMKPPE(11)-LDLFAMKPPE(7)                       | 2943.476864  | Oxidation[M](10)                  | AP180_430-500(69)-AP180_430-500(69) |
|                 | 3 AAPELDLFAMKPPE(11)-LDLFAMKPPE(7)                       | 2943.476864  | Oxidation[M](24)                  | AP180_430-500(69)-AP180_430-500(69) |
|                 | 4 GSAEAAPELDLFAMKPPE(15)-LQFQIKE(6)                      | 2931.469471  | Oxidation[M](14)                  | AP180_430-500(69)-AP2B2(159)        |
|                 | 5 LDFAMKPPE(7)-LDLFAMKPPE(7)                             | 2458.264709  | null                              | AP180_430-500(69)-AP180_430-500(69) |
|                 | 6 LFAMKPPE(5)-LFAMKPPE(5)                                | 2034.032544  | Oxidation[M](4);Oxidation[M](15)  | AP180_430-500(69)-AP180_430-500(69) |
|                 | 7 SILKNAAALE(4)-LFAMKPPE(5)                              | 2115.140507  | Oxidation[M](17)                  | AP2B2(240)-AP180_430-500(69)        |
| Monolink        | Peptide                                                  | Peptide_Mass | Modifications                     | Proteins                            |
|                 | 1 AAPELDLFAMKPPE(11)                                     | 1801.892749  | Oxidation[M](10)                  | AP180_430-500(69)                   |
|                 | 2 LDFAMKPPE(7)                                           | 1332.675507  | Oxidation[M](6)                   | AP180_430-500(69)                   |
|                 | 3 LFAMKPPE(5)                                            | 1104.564511  | Oxidation[M](4)                   | AP180_430-500(69)                   |
|                 | 4 LFAMKPPE(5)                                            | 1189.61727   | null                              | AP180_430-500(69)                   |
|                 | 5 LSTGIGMAPGGYVAPKAVWLPAVKAKGLE(16)                      | 3053.674247  | Oxidation[M](7)                   | AP2B2(15)                           |
|                 | 6 RQVFLATWKD(9)                                          | 1419.763012  | null                              | AP2B2(146)                          |
| Looplink        | Peptide                                                  | Peptide_Mass | Modifications                     | Proteins                            |
|                 | 1 LFELSTGIGMAPGGYVAPKAVWLPAVKAKGLEISGTFTHRQGHYME(19)(27) | 5198.684345  | Oxidation[M](10);Oxidation[M](46) | AP2B2(15)(23)                       |
|                 | 2 LFELSTGIGMAPGGYVAPKAVWLPAVKAKGLEISGTFTHRQGHYME(27)(29) | 5198.684345  | Oxidation[M](10);Oxidation[M](46) | AP2B2(23)(25)                       |
| Regular peptide | Peptide                                                  | Peptide_Mass | Modifications                     | Proteins                            |
|                 | 1 AAPELDLFAMKPPE                                         | 1528.771523  | null                              | AP180_430-500                       |
|                 | 2 ACSGNDPFAPSE                                           | 1194.473128  | null                              | AP180_430-500                       |
|                 | 3 ACSGNDPFAPSEGSAE                                       | 1538.606312  | null                              | AP180_430-500                       |



|                                                |                              |               |
|------------------------------------------------|------------------------------|---------------|
| 4 AFAASPGEAPAASE                               | 1275.585116 null             | AP180_430-500 |
| 5 AFAASPGEAPAASEGATAPATPAPVAAALD               | 2650.29938 null              | AP180_430-500 |
| 6 APAASEGATAPATPAPVAAALDACSGNDPFAPSE           | 3095.426095 null             | AP180_430-500 |
| 7 CHLNADTVSSKLQNNNVYTIAKRNVE                   | 2931.473989 null             | AP2B2         |
| 8 DGKMERQVFLATWKDIPNE                          | 2277.133124 null             | AP2B2         |
| 9 FAIQFNKNSFGVIPSTPLAIHTPLMPNQSID              | 3397.761152 null             | AP2B2         |
| 10 GATAPATPAPVAAALD                            | 1393.732105 null             | AP180_430-500 |
| 11 GATAPATPAPVAAALDACSGNDPFAPSE                | 2569.187392 null             | AP180_430-500 |
| 12 GATAPATPAPVAAALDACSGNDPFAPSEGSAE            | 2913.320576 null             | AP180_430-500 |
| 13 GKMERQVFLATWKDIPNE                          | 2162.106185 null             | AP2B2         |
| 14 GKMERQVFLATWKDIPNENE                        | 2405.191695 null             | AP2B2         |
| 15 GQDMLYQSLKLTNGIWILAE                        | 2309.184488 Oxidation[M](4)  | AP2B2         |
| 16 GSAEAAPELDFAMKPPE                           | 1872.904707 null             | AP180_430-500 |
| 17 HHHHHH                                      | 841.371277 null              | AP2B2         |
| 18 ISGTFTHRQGHYME                              | 1792.843448 Oxidation[M](14) | AP2B2         |
| 19 LDFAMKPPE                                   | 1176.59687 Oxidation[M](6)   | AP180_430-500 |
| 20 LFAMKPPE                                    | 948.485873 Oxidation[M](4)   | AP180_430-500 |
| 21 LFAMKPPET                                   | 1033.538633 null             | AP180_430-500 |
| 22 LFELSTGIGMAPGGYVAPKAVWLPAVKAKGLE            | 3270.795749 null             | AP2B2         |
| 23 LFGDAFAASPGE                                | 1181.54728 null              | AP180_430-500 |
| 24 LFGDAFAASPGEAPAASE                          | 1707.785982 null             | AP180_430-500 |
| 25 LGGGIGGSPAVGQSFIPSSVPATFAPSPTPAVVSSGLND     | 3595.827701 null             | AP2B2         |
| 26 LGGGIGGSPAVGQSFIPSSVPATFAPSPTPAVVSSGLNDLFE  | 3985.022755 null             | AP2B2         |
| 27 LGPPVNVQPQVSSMQMGAVD                        | 1941.940769 Oxidation[M](15) | AP2B2         |
| 28 LGPPVNVQPQVSSMQMGAVDLLGGGLD                 | 2551.28935 null              | AP2B2         |
| 29 LLGDLLNLD                                   | 985.556391 null              | AP2B2         |
| 30 LLGGGLDSLGLSD                               | 1216.641901 null             | AP2B2         |
| 31 LQFQIKE                                     | 905.509052 null              | AP2B2         |
| 32 LRIQPGNPNYTSLKCRAP                          | 2270.207287 null             | AP2B2         |
| 33 LSTGIGMAPGGYVAPKAVWLPAVKAKGLE               | 2881.600695 null             | AP2B2         |
| 34 LSTGIGMAPGGYVAPKAVWLPAVKAKGLEISGTFTHRQGHYME | 4639.431388 null             | AP2B2         |
| 35 MEQPQVIPSQGDLLGD                            | 1726.831547 null             | AP2B2         |
| 36 MLYQSLKLTNGIWILAE                           | 1993.082603 null             | AP2B2         |
| 37 MNFTNKALQHMTD                               | 1550.708939 null             | AP2B2         |
| 38 PFAPSEGSAE                                  | 991.436675 null              | AP180_430-500 |
| 39 PFAPSEGSAEAAPELD                            | 1587.717239 null             | AP180_430-500 |
| 40 PLNNLQVAVKNNID                              | 1551.848856 null             | AP2B2         |

|                                                     |                  |               |
|-----------------------------------------------------|------------------|---------------|
| 41 QPQVIPSQGD                                       | 1068.531965 null | AP2B2         |
| 42 QPQVIPSQGDLLGD                                   | 1466.74848 null  | AP2B2         |
| 43 RQVFLATWKD                                       | 1263.684375 null | AP2B2         |
| 44 RQVFLATWKDIPNE                                   | 1716.906702 null | AP2B2         |
| 45 RQVFLATWKDIPNENE                                 | 1959.992212 null | AP2B2         |
| 46 SILKNAAALE                                       | 1029.593836 null | AP2B2         |
| 47 SILKNAAALEHHHHHH                                 | 1851.947271 null | AP2B2         |
| 48 SLLGSDLGGGIGGSPAVGQSFIPSSVPATFAPSPTPAVVSSGLND    | 4168.108265 null | AP2B2         |
| 49 SLLGSDLGGGIGGSPAVGQSFIPSSVPATFAPSPTPAVVSSGLNDLFE | 4557.303319 null | AP2B2         |
| 50 TVSSKLQNNNVYTIAKRNVE                             | 2278.214874 null | AP2B2         |
| 51 VDLFGDAFAASPGEAPAASE                             | 1921.881329 null | AP180_430-500 |
| 52 VSLPLNTLGPVMKMEPLNNLQVAVKNNID                    | 3161.705949 null | AP2B2         |
| 53 VSQYIYQVYD                                       | 1277.604791 null | AP2B2         |
| 54 VSQYIYQVYDSILKNAAALE                             | 2288.180785 null | AP2B2         |

#### Amino acid sequence of AP180<sub>430-500</sub>:

GHMTTEVDLFGDAFAASPGEAPAASEGATAPATPAPVAAALDACSGNDPFAPSEGSAAEAPELDFAMKPPETSLEHHHHHH

#### Amino acid sequence of APβ2<sub>714-951</sub>:

GHMIGMAPGGYVAPKAVWLPVAKAKGLEISGTFTHRQGHYMEMNFTNKALQHMTDFAIQFNKNSFGVIPSTPLAIHTPLMPNQSIDVSLPLNTLGPVMKMEPLNNLQVA  
VKNNIDVFYFSCLIPLNVLFVEDGKMERQVFLATWKDIPNENELQFQIKECHLNADTVSSKLQNNNVYTIAKRNVEGQDMLYQSLKLTNGIWIWLAELRIQPGNPNYTSL  
KCRAPEVSQYIYQVYDSILKNAAALEHHHHHH

### Supplementary References:

1. Erdős, G. & Dosztányi, Z. Analyzing Protein Disorder with IUPred2A. *Current Protocols in Bioinformatics* **70**, e99 (2020).
2. Marsh, J. A., Singh, V. K., Jia, Z. & Forman-Kay, J. D. Sensitivity of secondary structure propensities to sequence differences between  $\alpha$ - and  $\gamma$ -synuclein: Implications for fibrillation. *Protein Sci* **15**, 2795–2804 (2006).
